# Supplementary material
Source: PubMed Central journal article supplement (PMC5885830)
Supplement: jamaoncol-4-302-s002.pdf [file jamaoncol-4-302-s002.pdf]

## Supplementary Online Content

Gianni L, Mansutti M, Anton A, et al. Comparing neoadjuvant nab-paclitaxel vs paclitaxel both followed by anthracycline regimens in women with *ERBB2/HER2*-negative breast cancer—the Evaluating Treatment with Neoadjuvant Abraxane (ETNA) Trial: a randomized phase 3 clinical trial. *JAMA Oncology*. Published online January 11, 2018. doi:10.1001/jamaoncol.2017.4612

**eAppendix.** List of collaborators

**eTable 1.** Patient demographic and clinical characteristics at randomization

**eTable 2.** Multivariate analysis of pathological Complete Remission (pCR)

**eTable 3.** Clinical objective response

**eTable 4.** Percent frequency of selected adverse events

**eTable 5.** Extent of exposure and dose modifications during taxane treatment in the safety population

**eTable 6.** Extent of exposure and dose modifications during anthracycline treatment and frequency of grade  $\geq 3$  treatment-emergent adverse events (TEAE) in the safety population

This supplementary material has been provided by the authors to give readers additional information about their work.

## **eAppendix. List of collaborators**

The Grupo Español de Investigación en Cáncer de Mama (GEICAM) members include Ignasi Tusquets, National Coordinator, Medical Oncology Department, Hospital del Mar, Barcelona; José Ponce, Hospital General Universitario de Alicante, Alicante; José E. Alés-Martínez, Hospital Nuestra Señora de Sonsoles, Ávila; Beatriz Cirauqui, Institut d'Investigació, Badalona; Montserrat Muñoz, Hospital Clinic i Provençal, Barcelona; Miguel Angel Seguí Palmer, Corporació Sanitària, Sabadell, Barcelona; Angels Arcusa Lanza, Consorci Sanitari, Terrassa, Barcelona; Santiago Gonzalez, Hospital San Pedro de Alcantara, Cáceres; Juan de la Haba-Rodríguez, Hospital U. Reina Sofía, Córdoba; Arrate Plazaola, Onkologiko, Donostia; Pedro Sanchez Rovira, Complejo Hospitalario de Jaen, Jaen; Lourdes Calvo, Hospital Teresa Herrera, La Coruña; Manuel Ramos, Centro Oncológico de Galicia, La Coruña; Serafin Morales Murillo, Hospital Universitari Arnau de Vilanova, Lleida; Miguel Martín Jiménez, Hospital Gregorio Marañón, Madrid; Beatriz Castelo, Hospital La Paz, Madrid; Antonio Gonzalez Martín, MD Anderson Cancer Center, Madrid; Carlos Jara Sánchez, Hospital U.Fundación Alcorcón, Madrid; Elena García Martínez, J.M. Morales Meseguer, Murcia; Isabel Garau, Hospital Son Llàtzer, Palma de Mallorca; Cesar A. Rodríguez, Hospital Clínico Universitario, Salamanca; Isabel Alvarez, Hospital Universitario Donostia, San Sebastián; Luis de la Cruz Merino, Hospital Universitario Virgen Macarena, Sevilla; Manuel Ruiz Borrego, Hospital Virgen del Rocío, Sevilla; Norberto Batista, Hospital Universitario de Canarias, Tenerife; José Ignacio Chacon Lopez-Muniz, Hospital Virgen de la Salud, Toledo; Begoña Bermejo, Hospital Clínico Universita, Valencia; Angel Guerrero, Instituto Valenciano Oncología, Valencia; Raquel Andres, Hospital Clínico Lozano Blesa, Zaragoza; Antonio Anton, Miguel Servet University Hospital, Aragón Health Research Institute, Zaragoza; GEICAM Team: Miguel Alvarez, Federico Alvarez, Cristina Blasco, Eva Carrasco, Nicolás de la Torre, Uxue Goicoechea, Ronald Maguiña, Beatriz Pardo, Azahara San Pedro, Meritxell Soler, Madrid

The Breast Cancer Research Center- Western Australia (BCRC-WA) members include Arlene Chan, Chair, Breast Cancer Research Center, Perth; Sid Selva-Nayagam, Royal Adelaide Hospital, Adelaide; David Speakman, Peter MacCallum Cancer Centre, Melbourne; Andrew Redfern, Royal Perth Hospital, Perth; Jacqui Chirgwin, Eastern Health Breast Cancer Research, Ringwood; BCRC-WA Team: Astrid Bauwens

The Michelangelo participants include Luca Gianni, Chair, Ospedale San Raffaele, Milano, Italy; PierMario Salvini, Cliniche Gavazzeni Humanitas, Bergamo, Italy; Claudio Zamagni, Policlinico Sant'Orsola Malpighi, Bologna, Italy; Gaion Fernando, Azienda U.L.S.S. 15 Alta Padovana, Camposampiero, Italy; Lucia Del Mastro, IST San Martino, Genova, Italy; Sergio Fava, A. O. Ospedale Civile di Legnano, Legnano, Italy; Salvatore Siena, A.O. Ospedale Niguarda Ca' Granda, Milano, Italy; Gabriella Mariani, Fondazione IRCCS Istituto Nazionale Tumori, Milano, Italy; Elena Piazza, Ospedale Luigi Sacco, Milano, Italy; Milvia Zambetti, Ospedale San Raffaele, Milano, Italy; Donatella Grasso, Fondazione IRCCS Policlinico San Matteo, Pavia, Italy; Giancarlo Bisagni, IRCCS Arcispedale S. Maria Nuova, Reggio Emilia, Italy; Laura Merlini, Azienda Unità Locale Socio-Sanitaria N. 6, Vicenza, Italy; Mauro Mansutti, Ospedale S. Maria della Misericordia, Udine, Italy; Christian Dittrich, Applied Cancer Research – Institution for Translational Research Vienna (ACR-ITR VIENNA) & Kaiser Franz Josef-Spital, Vienna, Austria; Wolfgang Eiermann, National Coordinator, IOC, München, Germany; Arthur Wischnik, Klinikum Augsburg, Augsburg; Germany; Gerd Graffunder, Frauenarzt-Zentrum-Zehlendorf, Berlin, Germany; Dirk Behringer, Augusta-Kranken-Anstalt gGmbH, Bochum, Germany; Marc Thill, Agaplesion Markus Hospital, Frankfurt, Germany; Hans Tesch, Bethanien-Krankenhaus, Frankfurt; Germany; Hans-Joachim Lück, Gynäkologisch-Onkologische Praxis, Hannover; Germany; Gertrud Helling-Giese, St.Elisabeth-Krankenhaus Brustzentrum, Köln; Germany; Anita Precht, Praxis Gynäkologie Arabella, München; Germany; Judith Franz-Werner, Onkologische Schwerpunktpraxis, Speyer; Germany; Vladimir Semiglazov, N.N. Petrov Research Inst. Oncol, St. Petersburg; Russia; Rebecca Dent, National Cancer Centre, Singapore; Michelangelo Team: Elisa Coradeschi, Raffaella De Fato, Veronica Giuliano, Rossella Vio, Domenico Magazzù, Pinuccia Valagussa, Milano, Italy

**eTable 1. Patient Demographic and Clinical Characteristics at Randomization**

| Characteristics                  | Total patients<br>(N = 695) |    | P<br>(N = 349) |    | nab-P<br>(N = 346) |    |
|----------------------------------|-----------------------------|----|----------------|----|--------------------|----|
|                                  | No.                         | %  | No.            | %  | No.                | %  |
| Stratification variables         |                             |    |                |    |                    |    |
| Cooperative<br>Research<br>Group |                             |    |                |    |                    |    |
| Michelangelo                     | 272                         | 39 | 137            | 39 | 135                | 39 |
| GEICAM                           | 377                         | 54 | 189            | 54 | 188                | 54 |
| BCRC-WA                          | 46                          | 7  | 23             | 7  | 23                 | 7  |
| Disease stage                    |                             |    |                |    |                    |    |
| Operable                         | 525                         | 76 | 261            | 75 | 264                | 76 |
| Locally advanced                 | 170                         | 24 | 88             | 25 | 82                 | 24 |
| Tumor subtype                    |                             |    |                |    |                    |    |
| Triple negative                  | 219                         | 32 | 110            | 32 | 109                | 32 |
| Luminal-B like high              | 377                         | 54 | 189            | 54 | 188                | 54 |
| Luminal-B like intermediate      | 99                          | 14 | 50             | 14 | 49                 | 14 |
| Other clinical characteristics   |                             |    |                |    |                    |    |
| cT stage                         |                             |    |                |    |                    |    |
| 1                                | 3                           | <1 | 2              | <1 | 1                  | <1 |
| 2                                | 503                         | 72 | 245            | 70 | 258                | 75 |
| 3                                | 132                         | 19 | 76             | 22 | 56                 | 16 |
| 4a-c                             | 42                          | 6  | 18             | 5  | 24                 | 7  |
| 4d                               | 15                          | 2  | 8              | 2  | 7                  | 2  |
| cN stage                         |                             |    |                |    |                    |    |
| 0                                | 348                         | 50 | 167            | 48 | 181                | 52 |
| 1                                | 291                         | 42 | 153            | 44 | 138                | 40 |
| 2                                | 56                          | 8  | 29             | 8  | 27                 | 8  |
| 3                                | 14                          | 2  | 6              | 2  | 8                  | 2  |

P: paclitaxel; nab-P: nab-paclitaxel; GEICAM: Grupo Español de Investigación en Cáncer de Mama; BCRC-WA: Breast Cancer Research Center- Western Australia

**eTable 2. Multivariate analysis of pCR**

| Variable      | Effect                            | Odds Ratio (95% CI) | P value  |
|---------------|-----------------------------------|---------------------|----------|
| Treatment     | P vs nab-P                        | 0.76 (0.52-1.13)    | 0.17     |
| Disease stage | Locally advanced vs early         | 0.74 (0.46-1.20)    | 0.23     |
| Tumor subtype | Triple negative vs luminal B-like | 4.85 (3.28-7.18)    | < 0.0001 |
| Age           | ≤ 50 yr vs > 50 yr                | 1.27 (0.86-1.88)    | 0.24     |

P: paclitaxel; nab-P: nab-paclitaxel; pCR: pathological complete response; CI: confidence interval

**eTable 3. Clinical objective response**

|                                      | End of Taxane          |                        | End of Chemotherapy    |                        |
|--------------------------------------|------------------------|------------------------|------------------------|------------------------|
|                                      | P                      | nab-P                  | P                      | nab-P                  |
| Objective clinical response (95% CI) | 66.5%<br>(61.3 – 71.4) | 69.4%<br>(64.2 – 74.2) | 74.5%<br>(69.6 – 79.0) | 77.2%<br>(72.4 – 81.5) |
| Complete Response                    | 20.1%                  | 20.8%                  | 41.8%                  | 42.2%                  |
| Partial Response                     | 46.4%                  | 48.6%                  | 32.7%                  | 35.0%                  |
| *Odds ratio (95% CI)                 | 0.88 (0.64, 1.21)      |                        | 0.87 (0.61, 1.23)      |                        |
| *p-value                             | 0.4392                 |                        | 0.4273                 |                        |
| Stable Disease                       | 14.9%                  | 11.3%                  | 5.7%                   | 2.6%                   |
| Progressive Disease                  | 0.6%                   | 2.3%                   | 5.7%                   | 5.5%                   |

\*Cochran-Mantel-Haenszel test, controlling for tumor subtype and disease stage and quantified by OR and rate difference

**eTable 4. Percent frequency of selected treatment-emergent adverse events (TEAE)**

|                                      | TEAE of any grade |                  |                  | Grade ≥ 3 TEAE   |                  |                   |
|--------------------------------------|-------------------|------------------|------------------|------------------|------------------|-------------------|
|                                      | P # 335           | nab-P # 337      | RD               | P # 335          | nab-P # 337      | RD                |
| Peripheral neuropathy                | 53.7 (48.2-59.2)  | 62.9 (57.5-68.1) | -8.9*<br>[0.016] | 1.8 (0.7-3.9)    | 4.5 (2.5-7.2)    | -2.7*<br>[0.47]   |
| Nausea                               | 55.8 (50.3-61.2)  | 56.1 (50.6-61.5) | -0.3             | 3.9 (2.1-6.5)    | 3.6 (1.96-1)     | 0.3               |
| Neutropenia                          | 36.4 (31.3-41.8)  | 41.8 (36.5-47.3) | -5.4             | 19.7 (15.6-24.4) | 30.6 (25.7-35.8) | -10.9*<br>[0.001] |
| Asthenia                             | 39.4 (34.1-44.9)  | 39.8 (34.5-45.2) | -0.4             | 1.8 (0.7-3.9)    | 2.7 (1.2-5.0)    | -0.9              |
| Fatigue                              | 31.3 (26.4-36.6)  | 36.8 (31.6-42.2) | -5.5             | 1.2 (0.3-3.0)    | 2.4 (1.0-4.6)    | -1.2              |
| Vomiting                             | 19.7 (15.6-24.4)  | 24.6 (20.1-29.6) | -4.9             | 2.4 (0.1-4.7)    | 4.2 (2.3-6.9)    | -1.8              |
| Diarrhea                             | 23.9 (19.4-28.8)  | 23.4 (19.0-28.3) | 0.5              | 0.9 (0.2-2.6)    | 2.1 (0.8-4.2)    | -1.2              |
| Leucopenia                           | 20.6 (16.4-25.3)  | 22.3 (17.9-27.1) | -1.7             | 7.2 (4.6-10.5)   | 8.3 (5.6-11.8)   | -1.1              |
| Rash                                 | 13.4 (10.0-17.6)  | 13.9 (10.4-18.1) | -0.5             | 0.9 (0.2-3.0)    | -                | 0.9               |
| Alanine Aminotransferase increase    | 11.6 (8.4-15.6)   | 8.0 (5.3-11.4)   | 3.6              | 1.5 (0.5-3.4)    | 0.3 (0.0-1.6)    | 1.2               |
| Lacrimation increase                 | 3.3 (1.7-5.8)     | 8.6 (5.8-12.1)   | -5.3*<br>[0.004] | -                | -                | -                 |
| Aspartate Amino-Transferase increase | 6.0 (3.7-9.1)     | 4.7 (2.7-7.6)    | 1.3              | 0.6 (0.1-2.1)    | -                | 0.6               |
| Hypersensitivity                     | 6.0 (3.7-9.1)     | 1.8 (0.7-3.8)    | 4.2*<br>[0.005]  | 0.6 (0.1-2.1)    | 0.3 (0.0-1.6)    | 0.3               |

TEAE: treatment emergent adverse event; P: paclitaxel; nab-P: nab-paclitaxel; RD: risk difference, i.e. frequency in P arm - frequency in nab-P arm; 95% confidence intervals in parenthesis; \*statistically significant, P value in brackets

**eTable 5 Extent of exposure and dose modifications during taxane treatment in the safety population\***

|                                                                                                                                           | <b>P # 335</b>                                              | <b>nab-P # 337</b>                                   |
|-------------------------------------------------------------------------------------------------------------------------------------------|-------------------------------------------------------------|------------------------------------------------------|
| Median treatment duration in weeks (range)<br>Mean treatment duration in weeks (SD)                                                       | 16 (4-19.7)<br>15.7 (2.2)                                   | 16 (4-21)<br>15.9 (1.8)                              |
| Median number of cycles (range)<br>Mean number of cycles (SD)                                                                             | 4 (1-4)<br>3.9 (0.5)                                        | 4 (1-4)<br>3.9 (0.4)                                 |
| Patients with dose omitted                                                                                                                | 20 (6%)                                                     | 24 (7.1%)                                            |
| Patients with dose reduction<br>Due to any adverse event                                                                                  | 32 (9.6%)<br>28 (8.4%)                                      | 39 (11.6%)<br>37 (11%)                               |
| Patients with dose delay<br>Due to any adverse event                                                                                      | 104 (31%)<br>49 (15%)                                       | 123 (36.5%)<br>69 (20.5%)                            |
| Median days of delay due to<br>adverse events<br>Median days of delay due to<br>other reasons (e.g. logistics)                            | 7 (1-20)<br>2 (1-12)                                        | 7 (1-20)<br>2 (1-7)                                  |
| Patients who discontinued taxanes<br>Due to adverse events<br>Patient's refusal to continue<br>on taxane<br>Progressive disease<br>Others | 27 (8.1%)<br>12 (3.4%)<br>1 (0.3%)<br>10 (2.9%)<br>4 (1.1%) | 32 (9.5%)<br>12 (3.5%)<br>-<br>16 (4.6%)<br>4 (1.2%) |
| Relative dose intensity**<br>Median<br>Mean (SD)                                                                                          | 99.53%<br>97.30 (12.39)                                     | 99.35%<br>(96.42 (8.55))                             |

\* Patient who received at least one dose of either taxane; P: paclitaxel; nab-P; nab-paclitaxel; SD: standard deviation)

\*\*The relative dose intensity (%) is the ratio between the absolute and the intended dose intensity (mg/m<sup>2</sup>/week) multiplied by 100

**eTable 6 Extent of exposure and dose modifications during anthracycline treatment and frequency of Grade ≥ 3 treatment-emergent adverse events (TEAE) in the safety population\***

|                                                  | <b>P # 312</b> | <b>nab-P # 322</b> |
|--------------------------------------------------|----------------|--------------------|
| Received regimen                                 |                |                    |
| AC (doxorubicin and cyclophosphamide)            | 87 (27.9%)     | 117 (36.3%)        |
| ED (epirubicin and cyclophosphamide)             | 108 (34.6%)    | 95 (29.5%)         |
| FEC (fluorouracil, epirubicin, cyclophosphamide) | 117 (37.5%)    | 110 (34.2%)        |
| Median number of cycles (range)                  | 4 (1-4)        | 4 (1-4)            |
| Mean number of cycles (SD)                       | 3.9 (0.5)      | 3.9 (0.4)          |
| Median treatment duration in weeks (range)       | 12 (3-15.1)    | 12 (3.16.6)        |
| Mean treatment duration in weeks (SD)            | 12.1 (1.3)     | 12 (1.7)           |
| Patients with dose reduction due to any drug     | 19 (6.1%)      | 29 (9.0%)          |
| Due to any adverse event                         | 16 (5.1%)      | 27 (8.4%)          |
| Patients with dose delay                         | 88 (28.2%)     | 89 (27.6%)         |
| Due to any adverse event                         | 68 (21.8%)     | 71 (22.9%)         |
| <b>Grade ≥ 3 TEAE</b>                            |                |                    |
| Peripheral neuropathy                            | 2 (0.6%)       | 3 (0.9%)           |
| Neutropenia                                      | 58 (18.6%)     | 79 (24.5%)         |
| Leucopenia                                       | 22 (7.1%)      | 22 (6.8%)          |
| Nausea                                           | 13 (4.2%)      | 17 (5.3%)          |
| Vomiting                                         | 8 (2.6%)       | 13 (4.0%)          |
| Fatigue                                          | 2 (0.6%)       | 7 (2.2%)           |

\* Patient who received at least one dose of anthracyclines after taxanes; P: received paclitaxel before anthracyclines; nab-P; received nab-paclitaxel before anthracyclines; SD: standard deviation)
